# Supplementary material
Source: MDPI journal article supplement (https://www.mdpi.com/2673-7523/2/2/9)
Supplement: s1 [file s1]

**Supplementary Table S1.** List of all normal-tumor paired matches considered for variant calling from the TCGA dataset. Only patients which were deposited with unambiguously normal-tumor pairs were included, resulting in a potential of 2207 matched samples. Other samples (which included ones which lacked a normal or tumor sample, ones which had multiple normal/tumor samples, etc. were excluded since they would have warranted a different approach). Information in the table includes the cancer type, the TCGA IDs of each of the matched samples along with their locations in a Google Storage bucket (controlled access).

**Supplementary Table S2.** The final list of accepted VCF files along with the number of Somatic SNVs in each sample pair. Total SNVs counts for accepted VCF files provided as a second sheet.

**Supplementary Table S3.** The final list of rejected VCF files, along with the number of SNVs (if calculated) in each sample pair. Ones which have "NA" represent samples where the counts were above 1 billion and not computed.
